# Supplementary material for: Quantifying the single scattering albedo for the January 2017 Chile wildfires from simulations of the OMI absorbing aerosol index
Source: Copernicus journal article supplement (doi:10.5194/amt-2018-40), 2018-02-12
Supplement: Supplementary file [file amt-2018-40-AC1-supplement.pdf]

This document contains the responses to the first referee, followed by a version 3 manuscript (starts in page 8). The reviewers' comments and questions are in bold. For each comment / question, the authors' reply / answer is in black, and the corresponding modifications in the manuscript version 3 are marked in blue colour.

## 5 (1) Author's response to Anonymous Referee #1

Thank you very much for your comments to our manuscript. The introduction has been trimmed. We also have revised the entire manuscript. The following are the responses to your specific comments.

10 **Line 20-21: a difference in SSA of 0.06 is very big as far as aerosol remote sensing and climate applications are concerned! It is not "slightly" smaller.**

We admit that a difference 0.06 is not a small value for SSA and we have deleted this word accordingly. This statement has been rephrased into *The retrieved mean  $\omega_0$  at 550 nm for the entire plume over the period from 26-30 January 2017 varies from 0.81 to 0.87, whereas the nearest AERONET station reported values in the range from 0.89 to 0.92 (line 21 - 23).*

15 But it is comparable with previous research. Hu et al. (2007) used TOMS AAI to retrieve SSA, their analytical uncertainty is 15%. For the typical AOD level in our case (0.3 ~ 0.7), the SSA uncertainty is 0.02 ~ 0.06 according to Hu et al. (2007) research, which matches with our results.

Furthermore, as we mentioned in the abstract and stressed throughout the manuscript, the AERONET site and the plume we defined are not collocated (the AERONET site is in the city centre as mention in *line 200*, which potentially overestimates the SSA). This makes this kind of retrieving to be validate. Other concerns, such as the lack of aerosol layer height, uncertainty in MODIS AOD and AERONET itself, should also be considered.

**Also, missing what is the purpose of this study? And what are the conclusions that the reader should take out of this work?**

25 This application attempts to quantify the aerosol absorption by retrieving SSA from satellite measured AAI. The conclusion is satellite retrieved AAI is a useful parameter to constrain forward simulation and to derive SSA. Although currently we have a difference of 0.06 compared with AERONET, this discrepancy can be interpreted by the uncertainties in the inputs and AERONET itself as well as difference in measurement techniques (i.e. satellite vs ground-based measurements).

30 The purpose is presented in the last paragraph in Section 1 (*line 59 - 61*).

**Line 41: incorrect definition of SSA, it is not a ratio of radiation. This is too basic to be missed.**

Thank you for the correction on the SSA definition.

We have rephrased to  *$\omega_0$  is defined as the ratio of the aerosol scattering over the extinction (line 33).*

35

**Line 43-44: No, POLDER does not measure the "aerosol polarized phase function". It measured polarized radiation that can be linked after modeling to the aerosol phase function.**

Thank you for the correction.

We have rephrased to *More advanced sensors, such as the POLarization and Directionality of the Earth's Reflectances (POLDER), can retrieve  $\omega_0$  from a combination of multi-angular, multi-spectral observations of the polarized radiation (line 36-38).*

40

Line 53-54: This is not entirely correct. Eck et al (2013) demonstrated that MODIS retrievals are impacted by the variation of SSA in smoke. (Eck, T. F., B. N. Holben, J. S. Reid, et al. 2013. "A seasonal trend of single scattering  
45 albedo in southern African biomass-burning particles: Implications for satellite products and estimates of emissions for the world's largest biomass-burning source." J. Geophys. Res. Atmos. 118 (12): 6414-6432 [10.1002/jgrd.50500])

It may be a misunderstanding. We are not saying aerosol absorption has no effect on AOD, we are just saying AOD is less sensitive to aerosol absorption. AOD could be large under either a very scattering case or a very absorbing case.

50 The reference as you mentioned here states the effect of retrieving AOD from a constant pre-assumed SSA, and this effect is presented as the systematic bias of retrieved MODIS AOD from AERONET AOD. This statement stresses more on the AOD retrieval bias is sensitive to SSA, rather than AOD itself.

Because the major revision in the Section 1 Introduction part, this sentence is no longer available.

55 **Line 60-61: not clear with what you mean that the AAI reduces the retrieval uncertainty. Uncertainty of what?**

Using AAI, instead of AOD to constrain the inversion of aerosol properties retrieval can reduce the uncertainty of retrieved aerosol parameters. For AAI, the uncertainties come from the measured reflectance. But for AOD, the uncertainties come from both the measured reflectance and pre-assumed aerosol types.

Because the major revision in the Section 1 Introduction part, this sentence is no longer available. The corresponding  
60 content is in line 48 – 49: The most important advantage of the satellite retrieved AAI is that it does not dependent on assumptions on aerosol types, while a-prior aerosol types are major uncertainties in aerosol parameter retrievals, such as  $\tau$ .

**Line 66-67: this is a poorly phrased sentence and very confusing, the AAI in presence of aerosol is sensitive to aerosol  
65 height, SSA and concentration,... not SSA alone.**

Sorry for the confusion. But we do not mean that AAI is only sensitive to SSA, just in terms of SSA, AAI is more sensitive than AOD.

Because the major revision in the Section 1 Introduction part, this sentence is no longer available. The corresponding content is in line 53: Moreover, the near-UV AAI is by definition highly sensitive to  $\omega_0$ .

70

**Line 98-99: incomplete/confusing sentence**

Sorry for the confusion.

We have rephrased to The basic idea of the residue method is that in a pure Rayleigh atmosphere, the reflectance (or equivalently the radiance ( $I_\lambda$ )) decreases strongly with the wavelength (line 79-80).

75

**Equation 2: what is the definition of  $\Delta I(\lambda)$ ? , This equation is different than what other groups use as definition of AAI. Can you provide a reference where this equation is derived? It seems to me a minus sign is missing, also not clear where the delta is coming from? For example de Graaf et al., (2007) uses the standard definition of AAI. how does you equation related with the more commonly used equations? (de Graaf, M., P.  
80 Stammes, and E. A. A. Aben (2007), Analysis of reflectance spectra of UV- absorbing aerosol scenes measured by SCIAMACHY, J. Geophys. Res., 112, D02206, doi:10.1029/2006JD007249.)**

We have added the definition of  $\Delta I_{\lambda_1}$  in line 88. We also have added that AAI calculation assumes a Rayleigh atmosphere at  $\lambda_2$ ,  $I_{\lambda_2}^{Ray}(a_s) = I_{\lambda_2}^{obs}$  (Herman et al., 1997) in line 87. The derivation from Eq.(1) to Eq.(2) is then not difficult (line 83). If it is still not clear to you, here is the derivation procedure:

85 According to the AAI definition:

$$AAI = -100 \left( \log_{10} \left( \frac{I_{\lambda_1}}{I_{\lambda_2}} \right)^{obs} - \log_{10} \left( \frac{I_{\lambda_1}}{I_{\lambda_2}} \right)^{Ray} \right) \quad (1)$$

, which can be re-written into:

$$AAI = -100(\log_{10}(I_{\lambda_1})^{obs} - \log_{10}(I_{\lambda_2})^{obs} - \log_{10}(I_{\lambda_1})^{Ray} + \log_{10}(I_{\lambda_2})^{Ray}) \quad (2)$$

90 , the Rayleigh radiance is calculated by a surface albedo that satisfies  $(I_{\lambda_2})^{obs} = (I_{\lambda_2})^{Ray}$ , then Eq.(2) can be re-written into:

$$AAI = -100(\log_{10}(I_{\lambda_1})^{obs} - \log_{10}(I_{\lambda_1})^{Ray}) \quad (3)$$

, reformed into:

$$AAI = 100(\log_{10}(I_{\lambda_1})^{Ray} - \log_{10}(I_{\lambda_1})^{obs}) \quad (4)$$

$$AAI = 100 \log_{10} \left( \frac{(I_{\lambda_1})^{Ray}}{(I_{\lambda_1})^{obs}} \right) \quad (5)$$

95 , here we define  $(I_{\lambda_1})^{Ray} = (I_{\lambda_1})^{obs} + \Delta I_{\lambda_1}$ , where  $\Delta I_{\lambda_1}$  can be explained as the change of radiance spectral dependency between a Rayleigh atmosphere and an observed atmosphere. Under cloud-free condition, the presence of absorbing aerosols lead to a positive  $\Delta I_{\lambda_1}$ . The definition of  $\Delta I_{\lambda_1}$  is also mentioned at line 105 in the manuscript. Then Eq.(5) can be re-written into:

$$AAI = 100 \log_{10} \left( \frac{(I_{\lambda_1})^{obs} + \Delta I_{\lambda_1}}{(I_{\lambda_1})^{obs}} \right) \quad (6)$$

$$100 \quad AAI = 100 \log_{10} \left( \frac{\Delta I_{\lambda_1}}{(I_{\lambda_1})^{obs}} + 1 \right) \quad (7)$$

, which is the Eq.(2) in the manuscript.

**Line 117: linear interpolation of what? What parameters are being interpolated? Please explain.**

Linear interpolation of complex refractive index over spectral range from 340 to 675 nm.

105 We have rephrased into part into We obtain the size distribution function and complex refractive index at 440, 675, 880 and 1018 nm from AERONET, and apply the linear interpolation / extrapolation to derive the complex refractive index over the spectrum from 340 to 675 nm, with spectral resolutions of 2 nm. Then DISAMAR uses above information to calculate the aerosol phase function  $P(\Theta)$  and  $\omega_0$  over the full spectrum (line 103-106).

110 **Line 123: Aeronet Phase function data is not reported at 354nm , where does this come from? As it is , this is not correct.**

The phase function at 354 nm is calculated by the radiative transfer model DISAMAR with AERONET constraints. We took size distribution function, and complex refractive index at 440, 675, 870 and 1018 nm from AERONET. We used linear extrapolation method to extend the spectrum refractive index to 340 nm. Then the radiative transfer model used that information to calculate the phase function and SSA over the full spectrum (those are intermediate outputs). That is

how the phase function and SSA at 354 nm comes. With those intermediate outputs (that carry information on aerosol types), DISAMAR can execute forward simulation of AAI.

120 We have rephrased this part into We obtain the size distribution function and complex refractive index at 440, 675, 880 and 1018 nm from AERONET, and apply the linear interpolation / extrapolation to derive the complex refractive index over the spectrum from 340 to 675 nm, with spectral resolutions of 2 nm. Then DISAMAR uses above information to calculate the aerosol phase function  $P(\Theta)$  and  $\omega_0$  over the full spectrum (line 103-106).

**Figures 3 and 4 cannot be interpreted because  $\Delta I$  has not been explained/defined. No further reading of the manuscript since what I found until here warrants a rejection.**

125 Please refer to the derivation of Eq (2)  $(I_{\lambda 1})^{Ray} = (I_{\lambda 1})^{obs} + \Delta I_{\lambda 1}$  in previous or line 88 in the manuscript.

**Line 15: what max value was observed?**

To your question, the maximum AAI observed by OMI for Chile 2017 wildfires over all the pixels of the 4 days is 5.80. The maximum median value is 4.05 and obtained on 29 January 2017.

130 **Line 18: what measurements/obs you are referring to? Radiances?**

We are referring to the CALIOP backscatter coefficient measurements.

We have rephrased into The simulated plume ascends to an altitude of 4.5-4.9 km, which is in good agreement with available CALIOP backscatter coefficient measurements (line 18-19).

135 **Line 18-20: not clear what you want to say in the sentence starting with "Due to the relatively..."**

To your question, the OMI observation is sparsely distributed which may contains geographical outliers that may not be the plume even it has AAI value larger than 1. Therefore, we applied an additional data quality control procedure with interquartile range technique. That is, calculate the difference between simulated and observed AAI, and remove the pixels that have AAI difference outside the interquartile range. This is detailed described in line 250-260.

140 We have rephrased into Due to the heterogeneity of the data that may contain the pixels outside the plume, an outlier detection criterion has to be applied (line 19-20).

**Line 20-21: are these SSA values averages over the plume or specific pixels?**

145 To your question, the retrieved SSA is the mean value for the entire plume over the period from 26-30 January 2017. We have rephrased to The retrieved mean  $\omega_0$  at 550 nm for the entire plume over the period from 26-30 January 2017 varies from 0.81 to 0.87, whereas the nearest AERONET station reported values in the range from 0.89 to 0.92 (line 21-23).

150 **Line 33: replace "bright surfaces" with "snow", I am assuming this is what you meant.**

Thank you for correction.

Because the major revision in the Section 1 Introduction part, this sentence is no longer available.

**Line 82-83: what are the locations of Pichilemu and Constitution? Are those forests ? Cities? regions? Please provide more details of the geographical setting. Was there a drought?**

The location of Pichilemu and Consitutución are two cities at the central of Chile as mentioned in [line 62](#). The local forestry industry (pine and eucalyptus) contributed a large fraction of the fire source in [line 64](#). There was a drought as mentioned in [line 61](#). All this information was actually mentioned in the version 2 manuscript.

160 **Line 84: figure 1 has very poor contrast when printed, please correct.**

The original plot is from NASA. It has been adjusted now ([line 515](#)).

165

170

175

180

185

190

195

# Quantifying the single scattering albedo for the January 2017 Chile wildfires from simulations of the OMI absorbing aerosol index

Jiyunting Sun<sup>1,2</sup>, J. Pepijn Veefkind<sup>1,2</sup>, Peter van Velthoven<sup>1</sup>, Pieternel F. Levelt<sup>1,2</sup>

<sup>1</sup>Royal Netherlands Meteorological Institute, De Bilt, 3731 GA, the Netherlands

<sup>2</sup>Department of Geoscience and Remote Sensing (GRS), Civil Engineering and Geosciences, Delft University of Technology, Delft, 2628 CD, the Netherlands

*Correspondence to:* Jiyunting Sun (jiyunting.sun@knmi.nl)

**Abstract.** The absorbing aerosol index (AAI) is a qualitative parameter directly calculated from satellite measured reflectances. Its sensitivity to absorption by aerosol particles in combination with a long data record start in the late 1970's makes it an important parameter for climate research. In the first part of this study, a series of AAI sensitivity analyses is presented exclusively on biomass burning aerosols. Later on, this study applies a radiative transfer model (DISAMAR) to simulate the AAI measured by the Ozone Monitoring Instrument (OMI) in order to derive the aerosol single scattering albedo ( $\omega_0$ ). The inputs for the radiative transfer calculations are satellite measurement geometry and surface conditions from OMI, aerosol optical thickness ( $\tau$ ) from the MODerate-resolution Imaging Spectroradiometer (MODIS), and aerosol micro-physical parameters from the AERosol RObotic NETwork (AERONET), respectively. This approach is applied to the Chile wildfires for the period from 26 to 30 January 2017, when the OMI observed AAI of this event reached its peak. The Cloud and Aerosol Lidar with Orthogonal Polarization (CALIOP) failed to capture the complete evolution of the smoke plume, therefore the aerosol profile is parameterized. The simulated plume ascends to an altitude of 4.5-4.9 km, which is in good agreement with available CALIOP backscatter coefficient measurements. Due to the heterogeneity of the data that may contain the pixels outside the plume, an outlier detection criterion has to be applied. The results show that the AAI simulated by DISAMAR is consistent with observations. The correlation coefficients fall into the range between 0.85 and 0.95. The retrieved mean  $\omega_0$  at 550 nm for the entire plume over the period from 26-30 January 2017 varies from 0.81 to 0.87, whereas the nearest AERONET station reported values in the range from 0.89 to 0.92. The difference in geolocation of the AERONET site and the plume, the assumption of homogeneous and static plume properties, the lack of the aerosol profile information, and the uncertainties in observations are primarily responsible for this discrepancy.

## 1 Introduction

Biomass burning aerosols are generated from combustion of carbon-containing fuels, either by natural or anthropogenic processes (Bond et al., 2004; IPCC, 2014). They are of great concern from the perspective of climate (Kaufman and Boucher, 2002; IPCC, 2007; Koch and Del Genio, 2010; Huang et al., 2013; IPCC, 2014). The reported radiative forcing of black carbon (BC) produced by fossil fuel and biofuel is around  $0.4 \text{ Wm}^{-2}$  ( $0.05 - 0.80 \text{ Wm}^{-2}$ ) (Ramanathan and Carmichael, 2008; Bond et al., 2013; Huang et al., 2013), but this estimate is highly uncertain. Accurate measurements of the aerosol single scattering albedo ( $\omega_0$ ) on a global scale can reduce the uncertainty in radiative forcing assessments (Hu et al., 2007).  $\omega_0$  is defined as the ratio of the aerosol scattering over the extinction. Currently  $\omega_0$  is mainly measured by ground-based instruments (Dubovik et al., 1998; Eck et al., 2003; Petters et al., 2003; Kassianov et al., 2005; Corr et al., 2009; Yin et al., 2015). Satellite derived  $\omega_0$  is usually retrieved simultaneously with the aerosol optical thickness ( $\tau$ ) based on the pre-defined aerosol properties (Torres et al., 2005; Torres et al., 2007). More advanced sensors, such as the POLarization and Directionality of the Earth's Reflectances (POLDER), can retrieve  $\omega_0$  from a combination of multi-angular, multi-spectral observations of the polarized radiation. By measuring the anisotropy of the reflected radiance for each ground pixel, POLDER is expected to determine the reflected solar flux more accurately (Leroy et al., 1997). Unfortunately, there is no

continuous temporal coverage because the first two POLDER missions ended prematurely due to technical problems on the satellite level. The third POLDER mission only covered the period 2004-2014.

Herman et al. (1997) first defined the near Ultra-Violet (UV) absorbing aerosol index (AAI), which provides an alternative methodology to retrieve  $\omega_0$  from satellite observations. The near-UV AAI, usually derived from the spectral range between 340 and 390 nm, is a qualitative measure of absorbing aerosols that was first provided by the Total Ozone Mapping Spectrometer (TOMS) on-board Nimbus-7 in 1979. Since then several instruments have contributed to the AAI data record, that now spans nearly four decades. This long data record is an important motivation for us to improve methods to derive quantitative aerosol information from the near-UV.

The most important advantage of the satellite retrieved AAI is that it does not depend on assumptions on aerosol types, while a-prior aerosol types are major uncertainties in aerosol parameter retrievals, such as  $\tau$ . Ginoux et al. (2004) suggested that comparing model simulations with AAI from TOMS allows a better control of discrepancies because the only error source is the model. Further advantages of AAI are the low reflectivity of the Earth's surface and the absence of significant molecular absorption over the near-UV range. Using this band can ensure the aerosol absorption is one of the major contributors to the total signal. Moreover, the near-UV AAI is by definition highly sensitive to  $\omega_0$ . Previous studies have proven the potential of the near-UV AAI from TOMS in aerosol properties retrieval. Torres et al. (1998) provided the theoretical basis of an inversion method to derive  $\tau$  and  $\omega_0$  from backscattered radiation. This method was validated by ground-based observations during the Southern African Regional Science Initiative (SAFARI) 2000 measurement campaign. The agreement of  $\tau$  and  $\omega_0$  reaches  $\pm 30\%$  and  $\pm 0.03$ , respectively (Torres et al., 2005). Hu et al. (2007) retrieved global columnar  $\omega_0$  based on the AAI from TOMS with an average uncertainty of 15%.

This study is inspired by previous research to quantify the aerosol absorption from AAI. We use the near-UV AAI provided by the Ozone Monitoring Instrument (OMI) on-board Aura, the successor of TOMS, to derive the aerosol properties of the Chile wildfires in January 2017. Triggered by a combination of long-term drought and high temperature, this series of fires occurring in central Chile (Pichilemu 34.39°S 72.00°W and Constitución 35.33°S, 72.42°W) was regarded as the worst wildfire season in the national history (The Guardian, 2017). The fires led to evacuations of the affected areas and caused massive losses of the local forestry industry (pine and eucalyptus forests) (NASA.gov, 2017). The smoke plume was transported away from the source regions towards the tropical area in the Pacific Ocean by north-westward winds (Fig.1). In this study, we quantitatively retrieve the  $\omega_0$  of this smoke by simulating the near-UV AAI from OMI with the radiative transfer model Determining Instrument Specifications and Analysing Methods for Atmospheric Retrieval (DISAMAR). The aerosol inputs of DISAMAR includes the  $\tau$  retrieved from the MODerate-resolution Imaging Spectroradiometer (MODIS) on-board the NASA EOS Aqua satellite, and information on aerosol micro-physical parameters provided by AERONET. In the next section, we provide a brief introduction on the near-UV AAI and its sensitivity to various parameters. The retrieval methodology is described in section 3. In section 4, retrieved results and uncertainty analysis of Chile 2017 wildfires are discussed, followed by main conclusions in section 5.

## 2 AAI sensitivity studies based on DISAMAR

In this section, we first introduce the near-UV AAI. In the sensitivity analysis, we show that the AAI depends not only on aerosol parameters, but also on the surface conditions and the observation geometry. The sensitivity analysis in this study is only designed for biomass burning aerosols.

### 2.1 Near-UV AAI definition

The concept of the near-UV AAI was first conceived to detect UV-absorbing aerosols from the spectral contrast provided by TOMS observations, known as the residue method (Herman et al., 1997). The basic idea of the residue method is that in a pure Rayleigh atmosphere, the reflectance (or equivalently the radiance ( $I_\lambda$ )) decreases strongly with the wavelength. The

presence of absorbing aerosols will reduce this spectral dependency of  $I_\lambda$ . The change in this wavelength dependency is summarized as the AAI, which is calculated from the  $I_\lambda$  at the wavelength pair  $\lambda_1$  and  $\lambda_2$  ( $\lambda_1 < \lambda_2$ ):

$$AAI = -100 \left( \log_{10} \left( \frac{I_{\lambda_1}}{I_{\lambda_2}} \right)^{obs} - \log_{10} \left( \frac{I_{\lambda_1}}{I_{\lambda_2}} \right)^{Ray} \right), \quad (1)$$

The *obs* and *Ray* denote the  $I_\lambda$  from the satellite measurement and calculated using a Rayleigh atmosphere, respectively.

280 The longer wavelength  $\lambda_2$  is treated as reference wavelength where the surface albedo ( $a_s$ ) is determined by fitting the observed radiance, i.e.  $I_{\lambda_2}^{Ray}(a_s) = I_{\lambda_2}^{obs}$ . This is done using an atmosphere containing only molecular scattering bounded by a Lambertian surface. The spectral dependence of the surface albedo is neglected thus  $I_{\lambda_1}^{Ray}$  is calculated using the same value for  $a_s$ . Defining  $\Delta I_{\lambda_1} = I_{\lambda_1}^{Ray} - I_{\lambda_1}^{obs}$ , Eq.(1) can be rewritten as:

$$AAI = 100 \log_{10} \left( \frac{\Delta I_{\lambda_1}}{I_{\lambda_1}^{obs}} + 1 \right) \quad (2)$$

285 It is advantageous to use Eq.(2) because the AAI can be simply interpreted as the ratio between the simulated and observed radiance at  $\lambda_1$ .

## 2.2 Near-UV AAI sensitivity studies

In this section, we present results from sensitivity studies performed with the radiative transfer model DISAMAR.

DISAMAR can perform simulations of the forward  $I_\lambda$  spectrum in a wide spectral coverage (270 nm to 2.4  $\mu$ m) and models scattering and absorption by gases, aerosols and clouds, as well as reflection by the surface (De Haan, 2011). It uses either the Doubling-Adding method or the Layer Based Orders of Scattering (LABOS) for the radiative transfer calculations. In this study the latter one is used, because it is less computationally intensive (De Haan et al., 1987; De Haan, 2011). DISAMAR allows to apply several aerosol scattering approximations. Here we assume Mie scattering aerosols. The parameters to describe Mie particles and their corresponding values are listed in Table 1. Considering the Chile wildfires plumes, which were dominated by biomass burning aerosols, these sensitivity studies are specifically performed for parameterized smoke aerosols, with only fine mode particles and weak linearly wavelength dependency of the complex refractive index ( $n_r$  and  $n_i$ ). The default values refer to observations of the daily average on January 27 of the AERONET station Santiago Beauchef (33.46°S, 70.66°W). We obtain the size distribution function and complex refractive index at 440, 675, 880 and 1018 nm from AERONET, and apply the linear interpolation / extrapolation to derive the complex refractive index over the spectrum from 340 to 675 nm, with spectral resolutions of 2 nm. Then DISAMAR uses above information to calculate the aerosol phase function  $P(\Theta)$  and  $\omega_0$  over the full spectrum. The corresponding  $P(\Theta)$  at 354 nm is presented in Fig.2. DISAMAR requires  $\tau$  to be defined at reference wavelength 550 nm. Surface parameters include a spectrally flat  $a_s$  and the surface pressure  $P_s$ . The aerosol profile is parameterized as a single layer box shape, with its bottom at  $z_{aer}-\Delta z/2$  and top at  $z_{aer}+\Delta z/2$ , where  $z_{aer}$  and  $\Delta z$  are the geometric central height and the geometric thickness of the aerosol layer, respectively. The whole sensitivity analysis is performed for cloud-free conditions. The wavelength pair of OMI (354 and 388 nm) is applied to compute the AAI. To make different sensitivities studies comparable, the AAI calculated in this section is normalized by the maximum value among each sensitivity study. Note that each sensitivity study always uses the default settings listed in Table 1, unless different values are explicitly mentioned.

Aerosol optical properties are determined by micro-physics, such as the real and imaginary part of the complex refractive index ( $n_r$  and  $n_i$ ), and the particle size ( $r_g$ ). Fig. 3 shows the variation of the AAI,  $\Delta I_{\lambda_1}$ ,  $I_{\lambda_1}^{obs}$  as well as of the optical properties  $\omega_0$  and the asymmetry factor  $g$ , as a function of the complex refractive and the particle size. The asymmetry factor  $g$  is the averaged cosine of the scattering angle  $\Theta$ , weighted by  $P(\Theta)$ . Fig. 3 shows that the effect of the complex refractive index is dual. As shown in Fig.3 (a), an increase in the real part of refractive index  $n_r$  directly enhances the magnitude of  $I_{\lambda_1}^{obs}$ , whereas  $\Delta I_{\lambda_1}$  reduces. This results in low values of the AAI, which correspond to a large  $\omega_0$  (Fig.3 (b)). Under the



condition that measurement angle is  $\Theta=150^\circ$ , the declining  $g$  implies that more light is scattered in the line-of-sight of the detector, thus the higher  $I_{\lambda 1}^{obs}$ . Conversely, the imaginary part of refractive index  $n_i$ , which is directly associated with  $\omega_0$ , has an opposite influence, see Fig.3 (c) and (d). The particle size distribution has a more complicated influence on the AAI. As shown in Fig.3 (e), the AAI first decreases and then increases, when  $r_g$  is varied from 0.1 to 0.4  $\mu\text{m}$ . The AAI primarily follows the behaviour of  $\Delta I_{\lambda 1}$ , whereas  $\omega_0$  is continuously decreasing and  $g$  is continuously increasing.

In addition to the micro-physics, the concentration and vertical distribution of aerosols also have a strong influence on the wavelength dependency of the radiance  $\Delta I_{\lambda 1}$ . As shown in Fig.4 (a), the AAI is positively correlated with  $\tau$ . The AAI is highly sensitive to the aerosol vertical distribution (Herman et al., 1997; Torres et al., 1998; de Graaf et al., 2005). As the aerosol layer ascends (Fig.4 (b)), more molecular scattering beneath the aerosol layer is shielded, which reduces  $I_{\lambda 1}^{obs}$  while increases  $\Delta I_{\lambda 1}$ . The relation between the AAI and  $z_{aer}$  is almost linear. Fig.4 (c) shows that at the same altitude, the AAI slightly increases with the geometrical thickness of the aerosol layer. The reason could be that a larger  $\Delta z$  indicates the coming sunlight has a higher possibility to be absorbed by aerosols, amplifying the absorption of the aerosol layer.

The calculated AAI does not only depend on the aerosols themselves, but also on ambient parameters such as surface and clouds. Although the near-UV AAI is capable to distinguish absorbing and non-absorbing agents (Herman et al., 1997) and even to retrieve aerosol information over clouds (Torres et al., 2012), the uncertainty triggered by clouds is relatively high and therefore cloudy conditions are excluded in this study. Surface conditions are parameterized by  $P_s$  and  $a_s$ . It can be seen in Fig.5 (a) that a decrease in  $P_s$ , or equivalently an elevated terrain height, leads to less Rayleigh scattering shielded between the surface and the aerosol layer. As a result, the AAI decreases significantly due to smaller  $\Delta I_{\lambda 1}$ , in agreement with a previous study (de Graaf et al., 2005). According to de Graaf et al. (2005), increasing  $a_s$  has two counteracting effects. On the one hand, it increases the amount of directly reflected radiation at the top of the atmosphere, namely a larger  $I_{\lambda 1}^{obs}$ , on the other hand it enhances the role of absorption by the aerosol layer rather than the surface, namely a larger  $\Delta I_{\lambda 1}$ . Which effect of  $a_s$  is decisive depends on  $P_s$  (Fig.5 (b)). When the aerosol layer is relative to the sea level ( $P_s = 1013$  hPa), the first effect dominates. However, a brighter surface compensates the loss of molecular scattering shielded by the aerosols when the terrain height rises ( $P_s = 813$  hPa), which makes the absorbing layer more detectable.

The AAI depends also on the Sun-satellite geometry. Here we provide the AAI as a function of the measurement geometries for the default case with the relative azimuth angle  $\Delta\phi = 180^\circ$ . As presented in Fig.6 (a), the AAI becomes very sensitive to the geometries for zenith angles larger than  $60^\circ$ , which confirms previous research (Herman et al., 1997; Torres et al., 1998; de Graaf et al., 2005). This is mainly due to the significant growth of  $P(\Theta)$  when  $\Theta$  becomes smaller (Fig.2). It is thus suggested that the OMI measurement with  $\theta_0$  larger than this value should be removed due to large variations in the AAI. To analyse the radiance behaviour as previously, we plotted the  $I_{\lambda 1}^{obs}$  and  $\Delta I_{\lambda 1}$  as a function of  $\Theta$  along the cross section, respectively (Fig.6 (b)). It is noted that  $I_{\lambda 1}^{obs}$  increases when  $\Theta$  is larger than  $90^\circ$ , whereas the  $P(\Theta)$  decreases at this range (Fig.2). The reason could be that the Rayleigh scattering has an increasing contribution to the radiance at those measurement angles (backscattering).

### 3 Methodology and datasets

In this section, we first present the datasets used and their pre-processing, followed by the strategy to retrieve the aerosol  $\omega_0$  while constraining the simulated near UV AAI to correspond to the observed one.

### 3.1 Datasets

#### 3.1.1 OMI and GOME-2 absorbing aerosol index

The TOMS near-UV AAI retrieval has been proven a robust algorithm and applied to successive sensors, such as OMI on-board Aura and GOME-2 on-board MetOp-A/B. GOME-2 has higher spectral resolution (0.2-0.4 nm) than TOMS, but the spatial resolution is rather coarse (80×40 km<sup>2</sup>). In this study, GOME-2 measured AAI at wavelength pair 340 and 380 nm (<http://archive.eumetsat.int>) is only used as an independent dataset to assess the potential bias of the OMI measurements. OMI combines advantages of both TOMS and GOME-2. It covers wavelengths from 264 to 504 nm with a spectral resolution of approximately 0.5 nm and has a much higher spatial resolution than GOME-2 of 13×24 km<sup>2</sup> (Levelt et al., 2006). Since OMI was launched in 2004, the AAI retrieved from this instrument has been widely used in various applications. Kaskaoutis et al. (2010) employed the OMI measured AAI for regional research of the aerosol temporal and spatial distribution in Greece. Torres et al. (2012) utilized the advantage of near-UV AAI to detect aerosols over clouds. The OMI observed AAI was even used to evaluate the impact of surface dust loading on human health (Deroubaix et al., 2013). Buchar et al. (2015) validated the NASA MERRA aerosol reanalysis with the AAI retrieved from OMI. In this study, the OMI level 2 product OMAERO (<https://disc.gsfc.nasa.gov>) is used to provide AAI retrieved at the wavelength pair of 354 and 388 nm, and the corresponding viewing geometry and the surface condition when the measurements took place. The samples are included in the radiative transfer simulation only if  $\theta_0$  is smaller than 60°, and if ground pixels are not contaminated by sun-glint, clouds, row anomalies of the instrument, etc. The simulation is only applied to ground pixels inside the biomass burning plume, which as AAI values larger than 1, for both OMI and GOME-2.

#### 3.1.2 MODIS and OMI aerosol optical thickness

MODIS on-board Aqua/Terra is a sensor that was specifically designed for atmosphere and climate research. The combination of two satellites ensures daily global coverage. The spatial resolution ranges from 250 m to 1 km and it has 36 spectral bands in the wavelength range between 400 nm and 14.4  $\mu$ m (Remer et al., 2005). MODIS employs separated algorithms for aerosol retrieval over oceans and land, respectively (Tanré et al., 1997; Kaufman and Tanré, 1998; Hsu et al., 2004; Remer et al., 2005). Currently the  $\tau$  provided by MODIS is one of the most reliable datasets (Lee et al., 2009), with an estimated uncertainty of only 3-5% over ocean and 5-15% over land (Remer et al., 2005). As mentioned before, DISAMAR requires  $\tau$  at 550 nm. This study uses cloud-filtered  $\tau$  at 550 nm from the Collection 6 level 2 product MYD04 as the input for radiative transfer calculation (<https://ladsweb.modaps.eosdis.nasa.gov>).

In addition, the  $\tau$  measured by OMI and AERONET are treated as a reference dataset to evaluate potential biases in MODIS. The OMAERO retrieval uses multi-spectral fitting techniques. The retrieved  $\tau$  is in good accordance with AERONET and is highly correlated with MODIS (Torres et al., 2007), with a correlation of 0.66 over land and 0.79 over the oceans (Curier et al., 2008), although it suffers from cloud contamination due to the relatively coarse spatial resolution of OMI. Due to the wavelength difference, the  $\tau$  measured by OMI at 442 nm has to be transferred to 550 nm using the Ångström exponent (ÅE) (440 – 675 nm) taken from AERONET at the time when OMI flies over the selected site. The AERONET dataset used in this study is introduced in the next section.

#### 3.1.3 AERONET aerosol properties

AERONET is an aerosol monitoring network of ground-based sun photometers. With standardized instruments, calibration, processing and distribution, AERONET provides a long-term global database for aerosol research and air-borne and space-borne measurement validation. The system takes two basic measurements. The  $\tau$  and ÅE are retrieved from the direct solar irradiance measurements; the  $r_g$ ,  $P(\Theta)$  (Nakajima et al., 1983; Nakajima et al., 1996),  $\omega_0$  (Dubovik et al., 1998),  $n_r$  and  $n_i$  (Dubovik and King, 2000) are derived from multiple-angular measurements of sky radiance.

The AERONET site nearest to the fire sources of 2017 Chile wildfires is the Santiago Beauchef (33.46°S, 70.66°W) (<https://aeronet.gsfc.nasa.gov>). The dataset in use is version 2 level 1.5 product. To minimize the influence of temporal difference, the parameters of AERONET measured near the time of the OMI overpass of the site are used to simulate the optical properties of Mie scattering aerosols in DISAMAR. Note that the level 1.5 dataset is not quality-assured, and the location of this site is in downtown of Santiago City and close to major roads. The presence of scattering aerosols may bias the measurements of the plume.

The AERONET measurements need to be processed into the inputs required by DISAMAR. Firstly, a conversion from the volume size distribution  $V(r_v, \sigma_v)$  provided by AERONET to the number size distribution  $N(r_g, \sigma_g)$  used in DISAMAR is required:

$$N(r_g, \sigma_g) = V(r_v, \sigma_v) \frac{3}{4\pi r_g^3} e^{-4.5\sigma_g^2}, \quad (4)$$

The following relation between the geometric and volumetric mean radii ( $r_g$  and  $r_v$ ) and standard deviations ( $\sigma_g$  and  $\sigma_v$ ) is assumed:

$$r_g = r_v e^{-3\sigma_g^2}, \quad (5)$$

$$\sigma_g = \sigma_v, \quad (6)$$

The fine and coarse mode particle size are derived by finding the two peaks of the log-normal distribution function provided by AERONET. The complex refractive index is assumed the same for both modes. Since bi-modal aerosol is not applicable in DISAMAR yet, we first calculate optical properties of two modes individually, then we externally combine the optical properties of two modes into a bi-modal aerosol with a fraction:

$$w_f = \frac{N_f(r_{g,f}, \sigma_{g,f})}{N_f(r_{g,f}, \sigma_{g,f}) + N_c(r_{g,c}, \sigma_{g,c})}, \quad (7)$$

$$w_c = 1 - w_f, \quad (8)$$

Then the weights for calculating the total  $\omega_0$  of the mixed aerosol are:

$$w_{\sigma,f} = \frac{w_f \sigma_f}{w_f \sigma_f + w_c \sigma_c}, \quad (9)$$

$$w_{\sigma,c} = 1 - w_{\sigma,f}, \quad (10)$$

Where the  $\sigma_f$  and  $\sigma_c$  are the extinction cross section of the fine and coarse aerosols. The expansion coefficients of the mixed aerosol is weighed by the  $\omega_0$  of the fine and coarse aerosols ( $\omega_{0,f}$  and  $\omega_{0,c}$ ), respectively:

$$w_{\omega_0,f} = \frac{w_f \sigma_f \omega_{0,f}}{w_f \sigma_f \omega_{0,f} + w_c \sigma_c \omega_{0,c}}, \quad (11)$$

$$w_{\omega_0,c} = 1 - w_{\omega_0,f}, \quad (12)$$

The spectral bands of the AERONET instrument at this site only covers the visible band. To constrain the spectral dependency of optical properties in the near-UV band, complex refractive index  $n_r$  and  $n_i$  in the UV band are linearly extrapolated using available data between 440 and 675 nm as mentioned in Section 2.2. Finally, the AERONET retrieved  $\tau$  and  $\omega_0$  is also linearly interpolated to 550 nm.

### 3.1.4 CALIOP backscattering coefficient

The CALIOP on-board CALIPSO, which was launched in 2006, provides high-resolution profiles of aerosols and clouds. It has three channels with one measuring the backscattering intensity at 1064 nm and the rest measuring orthogonally polarized components at 532 nm backscattering intensity (Winker and Omar, 2006). Due to the limited spatial coverage, CALIOP did not observe the Chile plume for all the cases for which we have OMI observations. We only use the total attenuated backscatter at 532 nm from level 1B Version 4.10 Standard data to evaluate the parameterized aerosol profiles (<https://eosweb.larc.nasa.gov/project/calipso>).

## 3.2 Methodology

In this study, we employ the radiative transfer model DISAMAR to simulate the near-UV AAI from OMI and to derive the  $\omega_0$  for a specific case, i.e. the Chile wildfires in January 2017. We select the period from 26 to 30 January 2017 (28 January is excluded due to lack of data) when the AAI value reached its peak. The aerosol information consists of the cloud free column  $\tau$  retrieved from MODIS, and the aerosol micro-physical parameters ( $r_g$ ,  $n_r$  and  $n_i$ ) retrieved from AERONET. The real part of the refractive index  $n_r$  in the UV band has a fixed value which is obtained by linearly extrapolating that from the AERONET observations at 440 to 675 nm assuming a small wavelength dependency of  $n_r$ . We set the imaginary part  $n_i$  as a free parameter to vary  $\omega_0$ , with an initial guess value obtained by extrapolation from AERONET like  $n_r$ .

The amount of observed aerosol vertical profiles is limited for the Chile wildfires. Instead, we implement the same parameterization as in the sensitivity study to obtain the aerosol profile. Since the AAI dependency on  $\Delta z$  is minor (Fig.4 (c)), and to reduce the computational cost,  $\Delta z$  is set constant of 2 km based on the information from the CALIOP measurements of backscattering coefficient ( $\beta$ ) at 532 nm (Fig.7). The  $z_{aer}$ , to which the AAI is highly sensitive, is treated as an unknown variable to be retrieved together with  $\omega_0$ .

With various combinations of  $z_{aer}$  and  $n_i$ , a lookup table (LUT) of the calculated AAI is constructed with DISAMAR. It should be noted that for all ground pixels in the plume we assume the same aerosol microphysical properties as well as the same vertical profile. Pixels outside the plume may have had significantly different properties and this will affect the results. But as shown in Fig.8, the distribution of OMI measurements is sparse in space, which implies that the dataset is quite sensitive to geographical outliers that may cause the heterogeneous properties of the plume. Consequently, we apply a data quality control procedure before retrieving  $\omega_0$ . First, we manually remove the pixels that are geographically isolated from the main plume. Furthermore, we remove the potential outliers based on statistical tool. We filter the dataset using an outlier detection based on the interquartile range (IQR) of the AAI difference between DISAMAR simulations and OMI measurements. According to Tukey's fences (Tukey, 1977), an AAI difference falling outside range between  $Q1-1.5 \text{ IQR}$  and  $Q3+1.5 \text{ IQR}$  may be regarded as an outlier and removed, where  $Q1$  and  $Q3$  are the first and third quartiles of the AAI difference, and the IQR is the range between  $Q1$  and  $Q3$ . Only the data passing the outlier detection criterion is used to calculate the cost function (Eq.(3)):

$$RMSE = \sqrt{\frac{\sum_i^n (AAI_{DSM,i}^{qualified} - AAI_{OMI,i})^2}{n}}, \quad (3)$$

Here  $AAI_i$  indicates the AAI for  $i$ th ground pixel of the selected OMI data; subscripts  $DSM$  and  $OMI$  indicate DISAMAR simulation and OMI observation, respectively. The combination of  $z_{aer}$  and  $\omega_0$  that leads to the minimum residue is used to simulate the AAI.

Finally, the simulated AAI is compared with OMI observations. We also employ the independent data from GOME-2 on MetOp-A/B as a reference to identify the potential bias of OMI. Similarly, the  $\tau$  retrieved from OMI and AERONET serves as a reference to that of MODIS. The estimated aerosol profile and  $\omega_0$  at 550 nm are evaluated with independent observations from CALIOP and AERONET, respectively.

## 4 Results and discussion

By applying the methodology described in the previous section, we quantitatively retrieved the aerosol profile and  $\omega_0$  of the Chile 2017 wildfires by AAI simulation. The OMI measurements of the plume are displayed in Fig.8 (a) – (d). The presented ground pixels are with AAI value larger than 1, and are free of cloud contamination, sun-glint and row anomaly of the instrument. Fortunately, the remaining data is still able to capture the main plume features. It can be clearly seen that from 26 to 30 January, the plume produced by wildfires in the central Chile was transported by the south-easterly trade wind from the continent towards the lower latitude region of the Pacific Ocean. The plume travelled over a distance of 3000 km during the period.

The vertical movement of the plume is given by CALIOP backscattering coefficient measurements ( $\beta$ ) at 532 nm (Fig.7). The CALIOP paths closest to the plume are marked by a black dashed line in Fig.7. It is noted that CALIOP probably did not always measure the plume and may even fail to capture the elevated plume, e.g. on 26 January. The aerosol layer captured by CALIOP is distributed from 2 km to 6 km, with an average height at approximately 4-5 km. The ascent of the plume was driven by the heat generated by the fires and sunlight absorption, as well as the atmospheric vertical motions. Fig.8 (e) – (h) show the AAI simulation selected by the data quality control mentioned in Section 3.2. The spatial distribution of the simulated AAI shows similar patterns as the OMI observations. Some data points that are geographically isolated from the plume, e.g. in case 26 and 30 January, differ strongly from what are observed inside the plume. Including these outliers in the optimization could bias the retrieved aerosol properties. This can also be seen in Fig.8 (i) – (l), where the points passing the data quality control described in Section 3.2 are highlighted in red colour. By removing the outliers, the average spatial correlation coefficient reaches 0.90.

Table 2 lists the statistics of the qualified AAI data, in terms of the median, relative difference and RMSE. The median of measured AAI ranges from 2 to 4 during the research period. Except for 26 January, the median of simulated AAI is in good agreement with the measurements, with relative differences within  $\pm 6\%$ . The low RMSE confirms the high spatial consistency between the simulations and the observations. The majority of the simulated AAI of 26 January is negatively biased, which is reflected by the small slope without an intercept correction in Fig.8 (i). A systematic bias in the inputs might cause this result.

In terms of  $\omega_0$ , both the AERONET measured and the AAI retrieved aerosol absorption become weaker with time (Table 2). The mean of the retrieved  $\omega_0$  at 550 nm is 0.84, while the AERONET measurements provide a mean value of 0.90. This difference might be due to the fact that the selected AERONET site is not exactly at the primary biomass burning regions as mentioned in section 3.1.3. Specifically, the location of the AERONET site is downtown, where the more reflective urban or industrial aerosols may be mixed with the smoke and enhance the measured  $\omega_0$ . Besides, it is also reported that AERONET tends to underestimate the absorption of biomass burning aerosols compared with in situ measurements (Dubovik et al., 2002; Reid et al., 2004). Also, the micro-physics parameters retrieved from AERONET are not error-free. The uncertainty of size distribution retrieval is minor for biomass burning aerosols (Dubovik et al., 2000). Under optically thick circumstances, when retrievals are quality-assured, the reported accuracy of complex refractive index is 0.04 for  $n_r$  and 30%-50% for  $n_i$ , respectively (Dubovik et al., 2002). For biomass burning aerosols particularly, the uncertainty of  $\omega_0$  is 0.03 under high aerosol loading ( $\tau_{440} > 0.5$ ) and 0.05-0.07 under low aerosol loading (Dubovik et al., 2002; Holben et al., 2006).

Although AERONET could overestimate the  $\omega_0$  for this case, information from other datasets could also bias our estimate of aerosol absorption. Among all the inputs, the parameterization of a one-layer box-shape aerosol profile could be the largest error source. Although the influence of  $\Delta z$  on the AAI is small (Fig.4 (c)), the AAI calculation highly depends on  $z_{aer}$  (Fig.4 (b)). As shown in Table 2, the estimated plume altitude varies from 4.5 to 4.9 km. As the black solid line indicated in Fig.7, the retrieved  $z_{aer}$  can accurately capture the measured geometric vertical location of the plume. The  $z_{aer}$  on 26 January seems overestimated because of the temporal and spatial difference. Concretely, CALIOP sampled the plume near the sources and close to the surface, while the plume observed by OMI had been already elevated and transported to the open ocean. The

lack of information on the real plume height makes it challenging to determine the main reason responsible for the systematic bias in Fig.8 (i). Except for 26 January,  $z_{aer}$  is in good agreement with what CALIOP observed. However, although the retrieved aerosol profiles are convincing to some extent, CALIOP and OMI observations are not exactly co-located. Besides, the estimated aerosol profile may fail to represent the spatial variation of the plume. Therefore, the uncertainty cannot be directly determined due to the lack of validation observations.

Among the four days for which we retrieved  $\omega_0$ , the value for 27 January is significantly lower than others. For this day the agreement with CALIOP is reasonable and also the CALIOP track is not far away from the OMI measurement. We therefore explore the effect of measurement biases in AAI and  $\tau$  on the retrieved  $\omega_0$ . We investigate the potential bias of these two datasets by plotting the histogram of the AAI measurement difference between GOME-2 and OMI (Fig.9 (a)), against the  $\tau$  measurement difference between MODIS and OMI (Fig.9 (b)). It is clear that on 27 January, the AAI from OMI seems to be overestimated compared to GOME-2. Although the difference in wavelength pair choice for AAI retrieval, measurement time and condition, etc., could be responsible for the AAI discrepancy between GOME-2 and OMI, exploring the difference between the two datasets is beyond the scope of this study. On the other hand, the  $\tau$  from MODIS could be potentially underestimated. This can be explained by the fact that the  $\tau$  measured in the MODIS visible band is more sensitive to aerosol scattering rather than aerosol absorption, thus may underestimate the absorbing part of the total  $\tau$ . Fitting a higher AAI with a lower input  $\tau$  leads to an overestimation in aerosol absorption. Here, we quantify the impact of  $\tau$  for this specific case by systematically enhancing the  $\tau$  of MODIS with a constant variation ( $\Delta\tau$ ) added to all sample points, with the AAI level and the aerosol profile remain unchanged. Fig.9 (c) presents how the AAI RMSE and the estimated  $\omega_0$  respond to the enhanced  $\tau$ . It can be clearly seen that an increase in overall  $\tau$  level by 0.07 raises  $\omega_0$  to 0.84 and optimizes the AAI simulation to a RMSE less than 0.45. If we apply this  $\tau$  adaption, the retrieved  $\omega_0$  of 27 January becomes more consistent with the other days.

Apart from the observational errors in AERONET, OMI and MODIS data, the assumption that the plume features are homogeneous could also result in the discrepancy between AAI retrieved and AERONET measured  $\omega_0$ . In reality, the plume altitude, the optical properties and even the chemical compositions could vary in space and time, while our simulations cannot take into account those effects.

## 5 Conclusions

Biomass burning is a major source of absorbing aerosols making a significant contribution to climate warming. Quantitatively characterizing the absorption by biomass burning aerosols is therefore important to reduce the uncertainty in assessments of global radiative forcing. Facing the lack of long-term  $\omega_0$  records, this study explores an approach to retrieve  $\omega_0$  based on reflectivity in the near-UV channel measured by OMI. Although AAI is not a geophysical parameter and depends on many parameters, its independence from pre-defined aerosol types, its high sensitivity to aerosol absorption as well as its long data record, makes it an attractive parameter to aerosol research.

We test the retrieval of  $\omega_0$  for the wildfires happening in central Chile in January 2017. After filtering the data from outliers, the high spatial correlation coefficients (0.85 to 0.95) between the simulated and observed AAI proves its necessity and effectiveness. The retrieved aerosol profiles indicate the plume was elevated to height of 4.5-4.9 km during the research period. These results are in agreement with CALIOP measurements. This average of the retrieved  $\omega_0$  at 550 nm is approximately 0.84, which is 0.06 lower than that of AERONET retrieval. The retrieved  $\omega_0$  is reasonable if one takes into account the typical uncertainty in the  $\omega_0$  retrieved from AERONET ( $\pm 0.03$ ). The remaining discrepancy is probably caused by the location of the AERONET site; the assumption of homogeneous and static plume properties, which ignores the plume evolution over space and time; the simplified parameterization of the aerosol profile; and the observational errors in the input

aerosol micro-physics,  $\tau$ , as well as AAI. We quantitatively analyse the uncertainty of  $\tau$  for a specific case (27 January) when the estimated aerosol profile is in good agreement with the CALIOP measurements.

This study proves the potential of utilizing OMI measured AAI to quantitatively characterize aerosol optical properties like  $\omega_0$ . Even though without direct observation of aerosol profiles, this parameter can be retrieved with quite confidence.

550 However, apart from the observational uncertainties, the current study is probably limited by the necessary assumptions of homogeneous and static plume properties to some extent, whose impact on retrieved  $\omega_0$  is difficult to quantify. In the future planned work, climatological data is expected to describe the evolution of the plume properties in space and time.

## Acknowledgements

This work was performed in the framework of the KNMI Multi-Annual Strategic Research (MSO). The authors thank to  
555 NASA's GES-DISC, LAADS DAAC and ASDC for free online access of OMI, MODIS and CALIOP data. The authors also thank to the Centre for Climate Resilience Research (CR)2 at University of Chile (CONICYT/FONDAP/15110009) providing the data of the Santiago Beauchef AERONET station.

## References

- Bond, T. C., Streets, D. G., Yarber, K. F., Nelson, S. M., Woo, J. H. and Klimont, Z.: A technology-based global inventory  
560 of black and organic carbon emissions from combustion, *J. Geophys. Res. D Atmos.*, 109, D14203, doi:10.1029/2003JD003697, 2004.
- Bond, T. C., Doherty, S. J., Fahey, D. W., Forster, P. M., Berntsen, T., Deangelo, B. J., Flanner, M. G., Ghan, S., K<sup>??</sup>rcher, B., Koch, D., Kinne, S., Kondo, Y., Quinn, P. K., Sarofim, M. C., Schultz, M. G., Schulz, M., Venkataraman, C., Zhang, H., Zhang, S., Bellouin, N., Guttikunda, S. K., Hopke, P. K., Jacobson, M. Z., Kaiser, J. W., Klimont, Z., Lohmann, U.,  
565 Schwarz, J. P., Shindell, D., Storelvmo, T., Warren, S. G. and Zender, C. S.: Bounding the role of black carbon in the climate system: A scientific assessment, *J. Geophys. Res. Atmos.*, 118, 5380–5552, doi:10.1002/jgrd.50171, 2013.
- Buchard, V., Silva, A. M., Colarco, P. R., Darmenov, A., Randles, C. A., Govindaraju, R., Torres, O. and Goddard, N.: Using the OMI aerosol index and absorption aerosol optical depth to evaluate the NASA MERRA Aerosol Reanalysis, *Atmos. Chem. Phys.*, 15, 5743–5760, doi:10.5194/acp-15-5743-2015, 2015.
- 570 Corr, C. A., Krotkov, N., Madronich, S., Slusser, J. R., Holben, B., Gao, W., Flynn, J., Lefer, B., Kreidenweis, S. M., Collins, F., Sciences, E., County, B., Division, A. C., Resource, N., Collins, F., Branch, B. S. and Sciences, A.: Retrieval of aerosol single scattering albedo at ultraviolet wavelengths at the T1 site during MILAGRO, *Atmos. Chem. Phys.*, 9, 5813–5827, 2009.
- Curier, R. L., Veefkind, J. P., Braak, R., Veihelmann, B., Torres, O. and de Leeuw, G.: Retrieval of aerosol optical properties  
575 from OMI radiances using a multiwavelength algorithm: Application to western Europe, *J. Geophys. Res. Atmos.*, 113, D17S90, doi:10.1029/2007JD008738, 2008.
- Deroubaix, A., Martiny, N., Chiapello, I. and Marticorena, B.: Remote Sensing of Environment Suitability of OMI aerosol index to reflect mineral dust surface conditions : Preliminary application for studying the link with meningitis epidemics in the Sahel, *Remote Sens. Environ.*, 133, 116–127, doi:10.1016/j.rse.2013.02.009, 2013.
- 580 de Graaf, M., Stammes, P., Torres, O. and Koelemeijer, R. B. A.: Absorbing Aerosol Index: Sensitivity analysis, application to GOME and comparison with TOMS, *J. Geophys. Res. D Atmos.*, 110, D01201, doi:10.1029/2004JD005178, 2005.
- de Haan, J. F.: DISAMAR Algorithm description and background information, De Bilt, 2011.
- de Haan, Johan F., Bosma, P.B and Hovenier, J. W.: The adding method for multiple scattering of polarized light, *Astron. Astrophys.*, 183, 371–391, 1987.
- 585 Dubovik, O., Holben, B., Eck, T. F., Smirnov, A., Kaufman, Y. J., King, M. D., Tanré, D., Slutsker, I., Sciences, G. E. and

- Directorate, E. S.: Variability of Absorption and Optical Properties of Key Aerosol Types Observed in Worldwide Locations, *J. Atmos. Sci.*, 59(3), 590–608, doi:10.1175/1520-0469(2002)059<0590:VOAAOP>2.0.CO;2, 2002.
- Dubovik, O., Holben, B. N., Kaufman, Y. J., Yamasoe, M., Smirnov, A., Tanré, D. and Slutsker, I.: Single-scattering albedo of smoke retrieved from the sky radiance and solar transmittance measured from ground, *J. Geophys. Res.*, 103, 31903–31923, doi:10.1029/98JD02276, 1998.
- Dubovik, O. and King, M. D.: A flexible inversion algorithm for retrieval of aerosol optical properties from Sun and sky radiance measurements, *J. Geophys. Res.*, 105, 20637–20969, doi:10.1029/2000JD900282, 2000.
- Dubovik, O., Smirnov, A., Holben, B. N., King, M. D., Kaufman, Y. J., Eck, T. F. and Slutsker, I.: Accuracy assessments of aerosol optical properties retrieved from Aerosol Robotic Network (AERONET) Sun and sky radiance measurements, *J. Geophys. Res.*, 105, 9791–9806, doi:10.1029/2000JD900040, 2000.
- Eck, T. F., Holben, B. N., Ward, D. E., Mukelabai, M. M., Dubovik, O., Smirnov, A., Schafer, J. S., Hsu, N. C., Piketh, S. J., Queface, A., Roux, J. Le, Swap, R. J. and Slutsker, I.: Variability of biomass burning aerosol optical characteristics in southern Africa during the SAFARI 2000 dry season campaign and a comparison of single scattering albedo estimates from radiometric measurements, *J. Geophys. Res.*, 108, 8477, doi:10.1029/2002JD002321, 2003.
- Eck, T. F., Holben, B. N., Reid, J. S., Mukelabai, M. M., Piketh, S. J., Torres, O., Jethva, H. T., Hyer, E. J., Ward, D. E., Dubovik, O., Sinyuk, A., Schafer, J. S., Giles, D. M., Sorokin, M., Smirnov, A. and Slutsker, I.: A seasonal trend of single scattering albedo in southern African biomass-burning particles : Implications for satellite products and estimates of emissions for the world ' s largest biomass-burning source, *J. Geophys. Res.*, 118, 6414–6432, doi:10.1002/jgrd.50500, 2013.
- Ginoux, P., Prospero, J. M., Torres, O. and Chin, M.: Long-term simulation of global dust distribution with the GOCART model: Correlation with North Atlantic Oscillation, *Environ. Model. Softw.*, 19, 113–128, doi:10.1016/S1364-8152(03)00114-2, 2004.
- Herman, J. R., Bhartia, P. K., Torres, O., Hsu, C., Seftor, C. and Celarier, E.: Global distribution of UV-absorbing aerosols from Nimbus 7/TOMS data, *J. Geophys. Res.*, 102, 16911–16992, doi:10.1029/96JD03680, 1997.
- Holben, B. N., Eck, T. F., Slutsker, I., Smirnov, A., Sinyuk, A., Schafer, J., Giles, D., Dubovik, O. and Lille, U. S. T. De: AERONET's Version 2.0 quality assurance criteria, *Int. Soc. Opt. Photonics*, 6408, 64080Q, 2006.
- Hsu, N. C., Tsay, S. C., King, M. D. and Herman, J. R.: Aerosol properties over bright-reflecting source regions, *IEEE Trans. Geosci. Remote Sens.*, 42, 557–569, doi:10.1109/TGRS.2004.824067, 2004.
- Hu, R. M., Martin, R. V. and Fairlie, T. D.: Global retrieval of columnar aerosol single scattering albedo from space-based observations, *J. Geophys. Res. Atmos.*, 112, D02204, doi:10.1029/2005JD006832, 2007.
- IPCC, 2007: Climate Change 2007: Synthesis Report. Contribution of Working Groups I, II and III to the Fourth Assessment Report of the Intergovernmental Panel on Climate Change [Core Writing Team, Pachauri, R.K and Reisinger, A. (eds.)]. IPCC, Geneva, Switzerland, 104 pp.
- IPCC, 2014: Climate Change 2014: Synthesis Report. Contribution of Working Groups I, II and III to the Fifth Assessment Report of the Intergovernmental Panel on Climate Change [Core Writing Team, R.K. Pachauri and L.A. Meyer (eds.)]. IPCC, Geneva, Switzerland, 151 pp.
- Kaskaoutis, D.G.; Nastos, P.T.; Kosmopoulos, P.G.; Kambezidis, H.D.; Kharol, S.K. and Badarinath, K. V. S.: The Aura – OMI Aerosol Index distribution over Greece, *Atmos. Res. J.*, 98, 28–39, doi:10.1016/j.atmosres.2010.03.018, 2010.
- Kassianov, E. I., Barnard, J. C. and Ackerman, T. P.: Retrieval of aerosol microphysical properties using surface MultiFilter Rotating Shadowband Radiometer (MFRSR) data : Modeling and observations, *J. Geophys. Res.*, 110, D09201, doi:10.1029/2004JD005337, 2005.
- Kaufman, Y. J., Tanré, D. and Boucher, O.: A Satellite View of Aerosols in the Climate System, *Nature*, 419, 215–223, 2002.



- Koch, D. and Del Genio, A. D.: Black carbon semi-direct effects on cloud cover: Review and synthesis, *Atmos. Chem. Phys.*, 10, 7685–7696, doi:10.5194/acp-10-7685-2010, 2010.
- Lee, K. H., Li, Z., Kim, Y. J. and Kokhanovsky, A.: Atmospheric Aerosol Monitoring from Satellite Observations: A History of Three Decades, in *Atmospheric and Biological Environmental Monitoring*, pp. 13–38., 2009.
- Leroy, M., Deuzé, J. L., Bréon, F. M., Hautecoeur, O., Herman, M., Buriez, J. C., Tanré, D., Bouffières, S., Chazette, P. and Roujean, J. L.: Retrieval of atmospheric properties and surface bidirectional reflectances over land from POLDER/ADEOS, *J. Geophys. Res.*, 102, 17023–17037, doi:10.1029/96JD02662, 1997.
- Levelt, P. F., Oord, G. H. J. Van Den, Dobber, M. R., Mälkki, A., Visser, H., Vries, J. De, Stammes, P., Lundell, J. O. V and Saari, H.: The Ozone Monitoring Instrument, *IEEE Trans. Geosci. Remote Sens.*, 44, 1093–1101, 2006.
- Myhre, G., Shindell, D., Bréon, F. M., Collins, W., Fuglestad, J., Huang, J., ... & Nakajima, T.: Anthropogenic and Natural Radiative Forcing, *Clim. Chang.*, 432, 658–740, 2013.
- Nakajima, T., Tanaka, M. and Yamauchi, T.: Retrieval of the optical properties of aerosols from aureole and extinction data, *Appl. Opt.*, 22, 2951–2959, 1983.
- Nakajima, T., Tonna, G., Rao, R., Boi, P., Kaufman, Y. and Holben, B.: Use of sky brightness measurements from ground for remote sensing of particulate polydispersions, *Appl. Opt.*, 35, 2672–2686, doi:10.1364/AO.35.002672, 1996.
- NASA.gov: NASA's Terra Catches Fires in Central Chile, [online] Available from: [https://www.nasa.gov/image-](https://www.nasa.gov/image-feature/goddard/2017/nasas-terra-catches-fires-in-central-chile)
- feature/goddard/2017/nasas-terra-catches-fires-in-central-chile (Accessed 1 May 2017), 2017.
- Petters, J. L., Saxena, V. K., Slusser, J. R., Wenny, B. N. and Madronich, S.: Aerosol single scattering albedo retrieved from measurements of surface UV irradiance and a radiative transfer model, *J. Geophys. Res.*, 108, 4288, doi:10.1029/2002JD002360, 2003.
- Ramanathan, V. and Carmichael, G.: Global and regional climate changes due to black carbon, *Nat. Geosci.*, 1, 221–227, doi:10.1038/ngeo156, 2008.
- Reid, J. S., Eck, T. F., Christopher, S. A., Koppmann, R., Dubovik, O., Eleuterio, D. P., Holben, B. N., Reid, E. A. and Zhang, J.: A review of biomass burning emissions part III: intensive optical properties of biomass burning particles, *Atmos. Chem. Phys. Discuss.*, doi:10.5194/acpd-4-5201-2004, 2004.
- Remer, L.A., Kaufman, Y.J., Tanré, D., Mattoo, S., Chu, D.A., Martins, J.V., Li, R.R., Ichiku, C., Levy, R.C., Kleidman, R.G., Eck, T.K., Vermote, E. and Holben, B. N.: The MODIS Aerosol Algorithm, Products, and Validation, *J. Atmos. Sci.*, 62, 947–973, 2005.
- Remer, L.A., Tanré, D. and Kaufman, Y. J.: Algorithm for remote sensing of tropospheric aerosol from MODIS: Collection 5 Product ID: MOD04/MYD04-C005., 1998.
- D.C. Stein Zweers: TROPOMI ATBD of the UV aerosol index., 2016.
- Tanr, D., J Kaufman, B. Y., Herman, M. and Mattoo, S.: Remote sensing of aerosol properties over oceans using the MODIS/EOS spectral radiances, *J. Geophys. Res.*, 102, 16971–16988, doi:10.1029/96JD03437, 1997.
- The Guardian: Chile battles devastating wildfires: 'We have never seen anything on this scale', [online] Available from: [https://www.theguardian.com/world/2017/jan/25/chile-fire-firefighting-international-](https://www.theguardian.com/world/2017/jan/25/chile-fire-firefighting-international-help?utm_source=Climate+News+Network&utm_campaign=afdf3cf10c-EMAIL_CAMPAIGN_2017_02_03&utm_medium=email&utm_term=0_1198ea8936-afdf3cf10c-38798061)
- help?utm\_source=Climate+News+Network&utm\_campaign=afdf3cf10c-EMAIL\_CAMPAIGN\_2017\_02\_03&utm\_medium=email&utm\_term=0\_1198ea8936-afdf3cf10c-38798061 (Accessed 25 Jan 2017), 2017.
- Torres, O., Bhartia, P. K., Herman, J. R., Ahmad, Z. and Gleason, J.: Derivation of aerosol properties from satellite measurements of backscattered ultraviolet radiation: Theoretical basis, *J. Geophys. Res. Atmos.*, 103, 17099–17110, doi:10.1029/98JD00900, 1998.
- Torres, O., Bhartia, P. K., Sinyuk, A., Welton, E. J. and Holben, B.: Total Ozone Mapping Spectrometer measurements of aerosol absorption from space: Comparison to SAFARI 2000 ground-based observations, *J. Geophys. Res. D Atmos.*, 110,

D10S18, doi:10.1029/2004JD004611, 2005.

Torres, O., Tanskanen, A., Veihelmann, B., Ahn, C., Braak, R., Bhartia, P. K., Veefkind, P. and Levelt, P.: Aerosols and surface UV products from Ozone Monitoring Instrument observations : An overview, *J. Geophys. Res.*, 112, D24S47, doi:10.1029/2007JD008809, 2007.

Torres, O., Jethva, H. and Bhartia, P. K.: Retrieval of Aerosol Optical Depth above Clouds from OMI Observations: Sensitivity Analysis and Case Studies, *J. Atmos. Sci.*, 69, 1037–1053, doi:10.1175/JAS-D-11-0130.1, 2012.

Tukey, J.W.: *Exploratory data analysis*, Addison-Wesley Publishing Company, 1977.

Winker, D. M., Vaughan, M. A., Omar, A., Hu, Y., Powell, K. A., Liu, Z.; Hunt, W.H.; Young, S. A.: Overview of the CALIPSO Mission and CALIOP Data Processing Algorithms, *Technol. J. Atmos. Ocean.*, 26, 2310–2323, doi:10.1175/2009JTECHA1281.1, 2009.

Yin, B., Min, Q. and Joseph, E.: Retrievals and uncertainty analysis of aerosol single scattering albedo from MFRSR measurements, *J. Quant. Spectrosc. Radiat. Transf.*, 150, 95–106, doi:10.1016/j.jqsrt.2014.08.012, 2015.

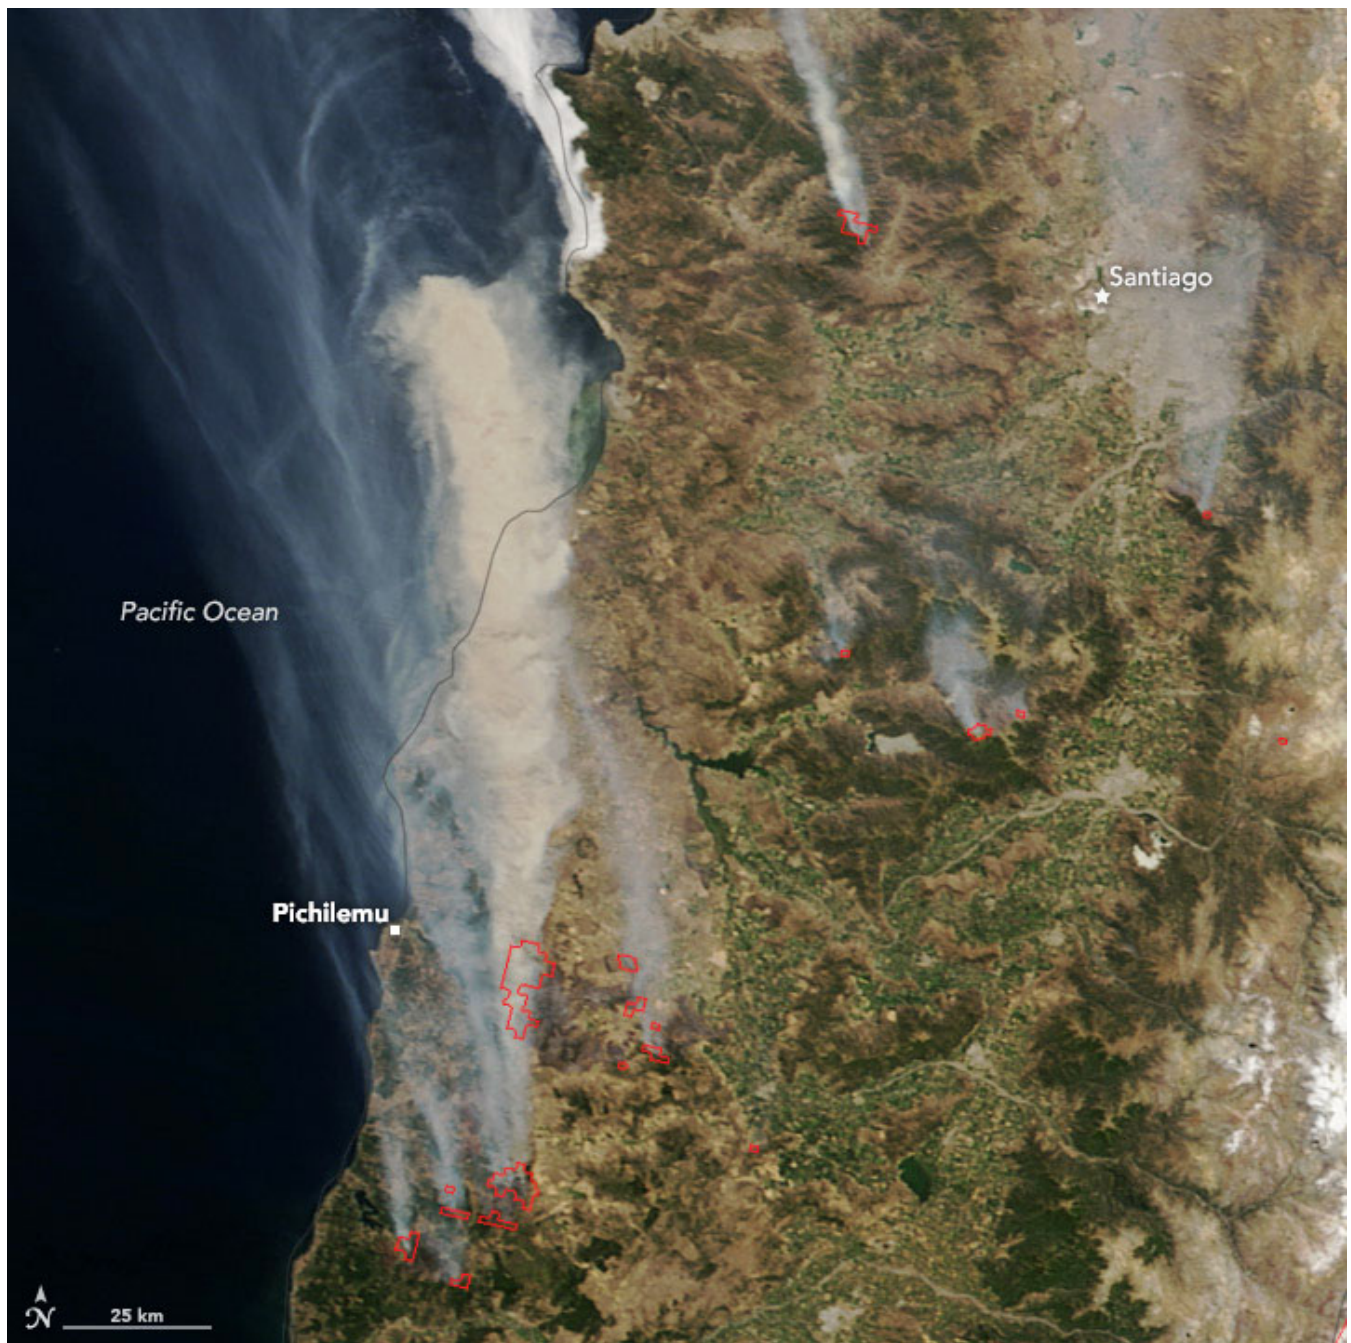

Figure 1: Chile wildfires detected by Terra/MODIS on 20 January 2017 (Image source: NASA's Earth Observatory <https://earthobservatory.nasa.gov/IOTD/view.php?id=89496>).

710

715

720

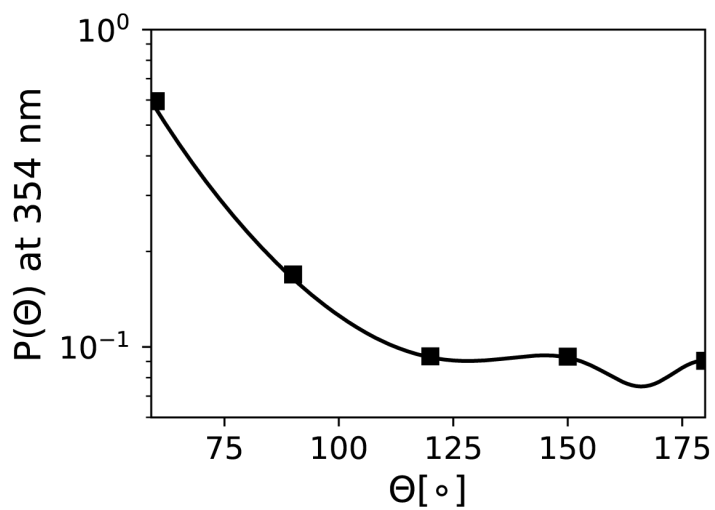

Figure 2: Phase function  $p(\Theta)$  at 354 nm of the parameterized Mie scattering aerosols in sensitivity analysis. The markers in the plot correspond to the value when  $\Theta=60^\circ, 90^\circ, 120^\circ, 150^\circ, 180^\circ$ .

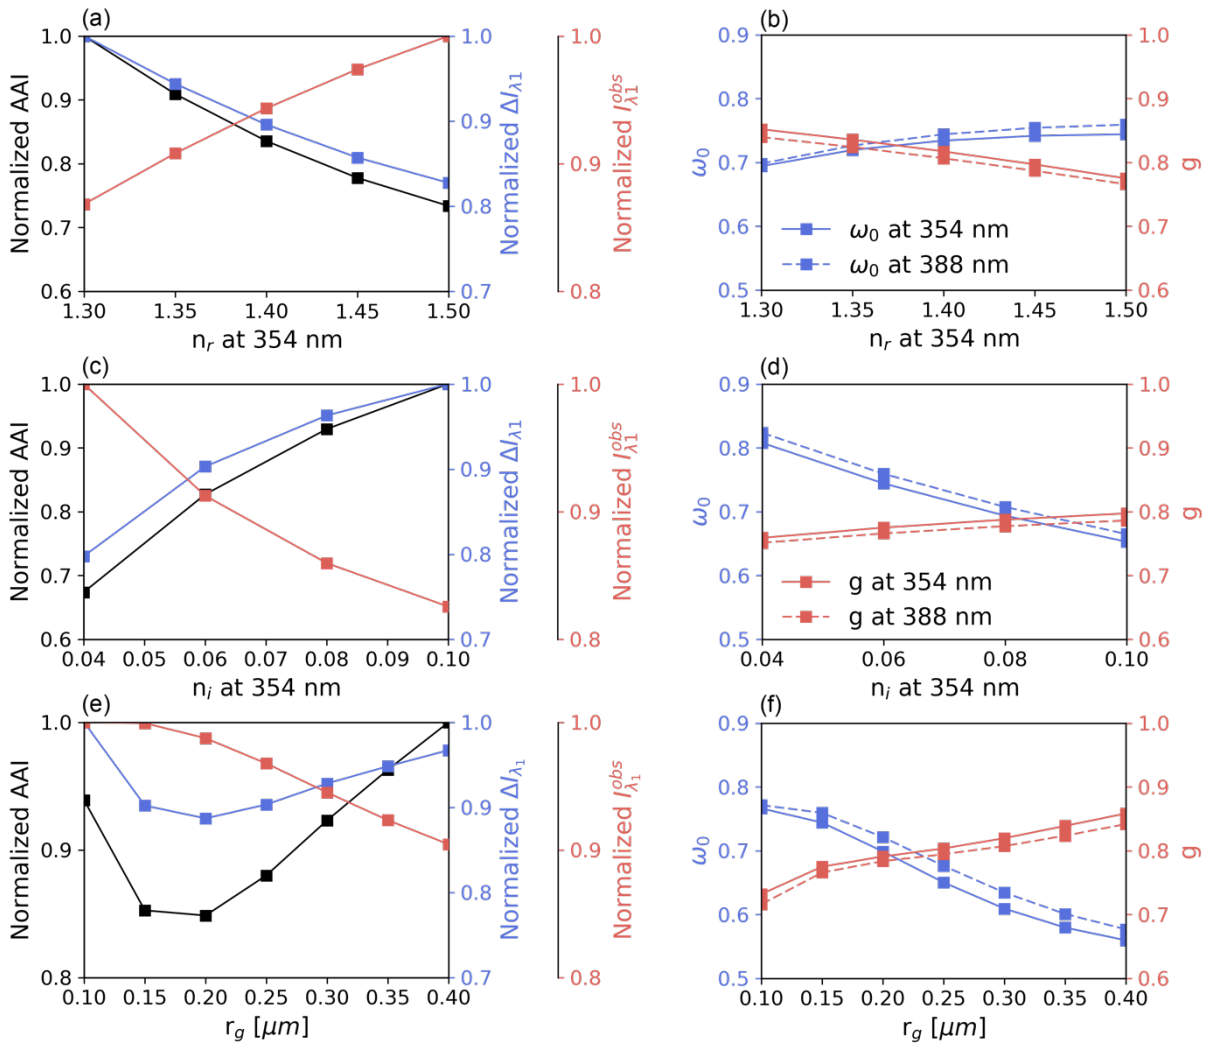

**Figure 3:** AAI sensitivity to micro-physical parameters:  $n_i$  (a, b),  $n_r$  (c, d), and  $r_g$  (e, f). The left panels (a, c and e) show the sensitivity of the normalized AAI (black), the normalized  $\Delta I_{\lambda 1}$  (blue) and the normalized  $I_{\lambda 1}^{obs}$  (red). The right panels (b, d and f) show  $\omega_0$  (blue) and  $g$  (red) at wavelength 354 (solid line) and 388 (dashed line) nm, respectively.

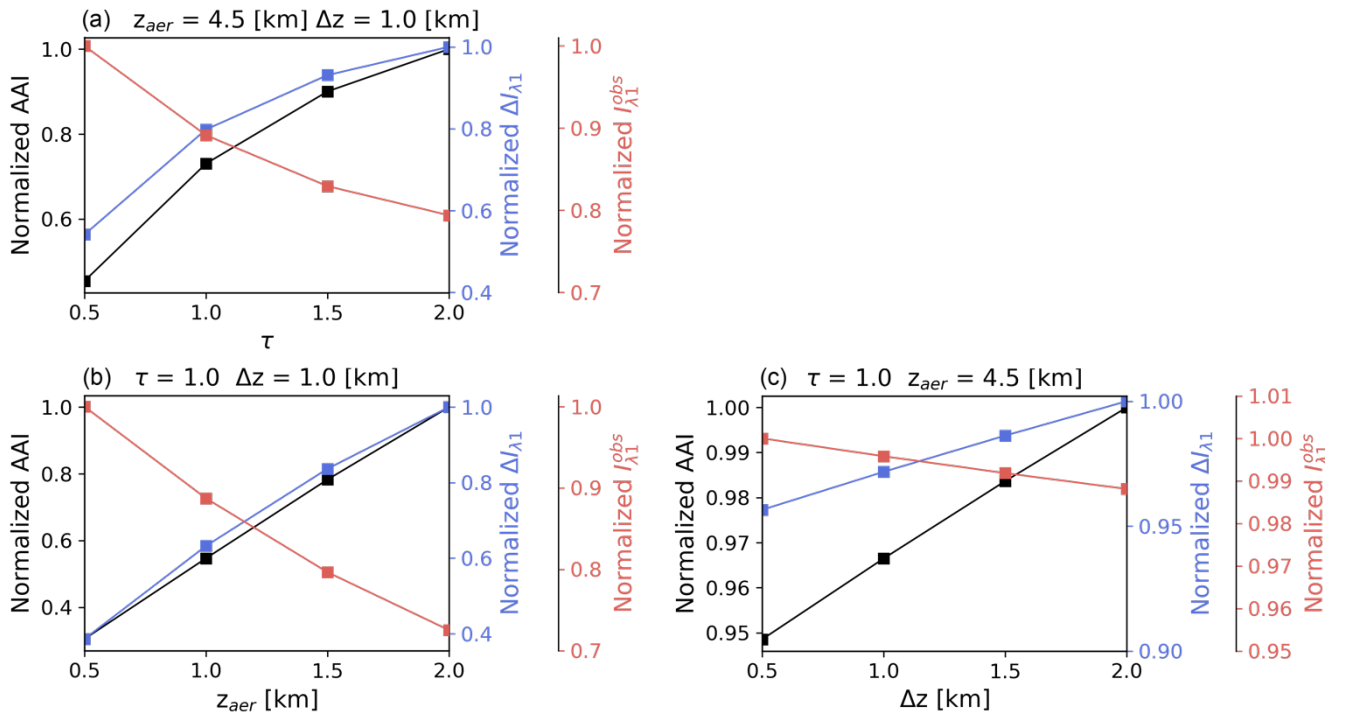

Figure 4: AAI sensitivity to macro-physical parameters: (a)  $\tau$  at 550 nm, (b)  $z_{aer}$  and (c)  $\Delta z$ .

755

760

765

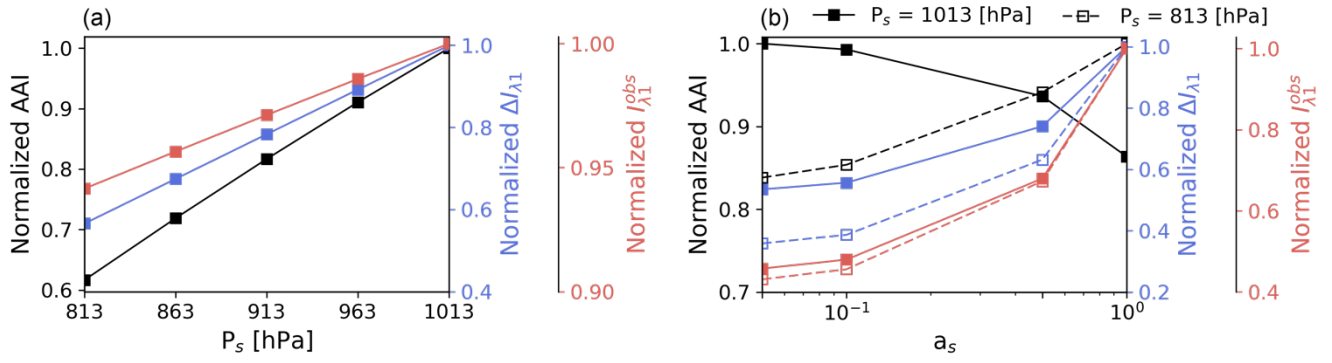

Figure.5 AAI sensitivity to surface parameters:  $a_s$ (a) and  $P_s$ (b). The solid line and dashed line in (b) indicates terrain height at sea level ( $P_s = 1013$  hPa) and elevated terrain height ( $P_s = 813$  hPa), respectively.

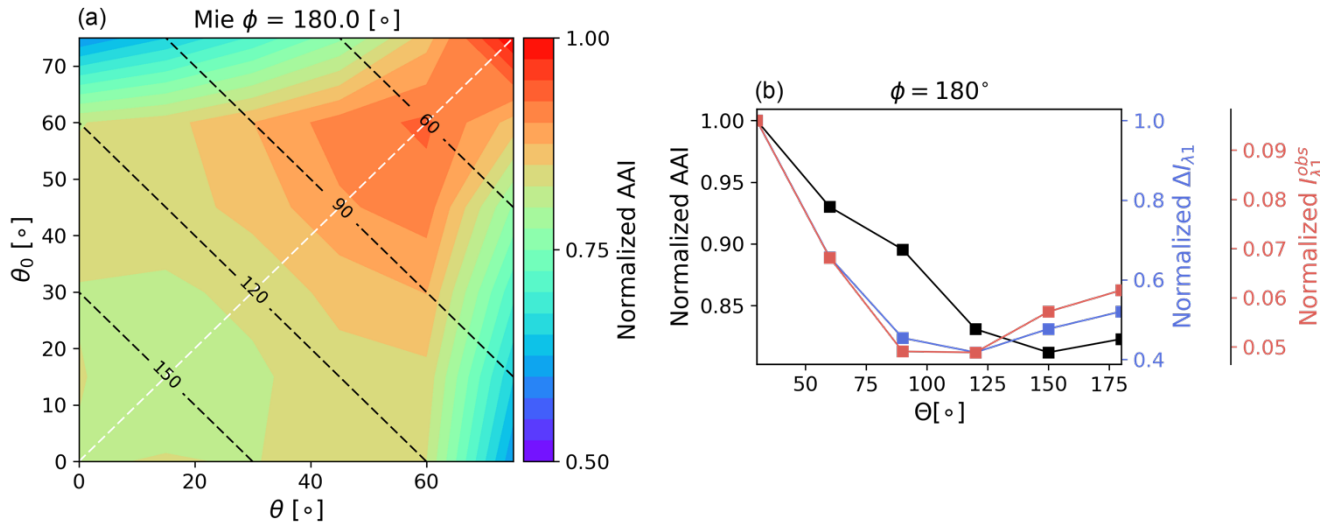

Figure.6 AAI sensitivity to  $\theta$  and  $\theta_0$  at  $\phi=180^\circ$ . The black dashed contour in (a) indicates the  $\Theta=60^\circ, 90^\circ, 120^\circ, 150^\circ$ . The white dashed line in (a) indicates the cross section.

800

805

810

815



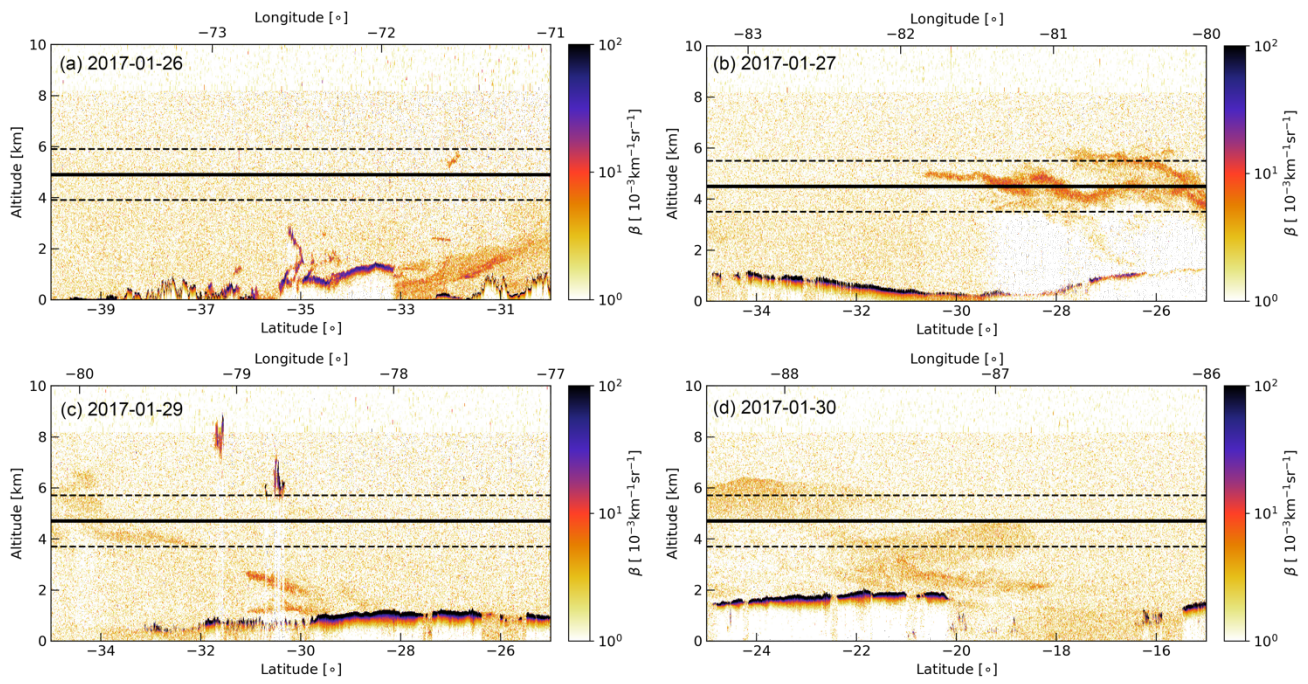

Figure.7 CALIOP backscatter coefficient  $\beta$  at 532 nm. The solid and dashed line indicate the retrieved  $z_{\text{aer}}$  and  $\Delta z$ , respectively.

820

825

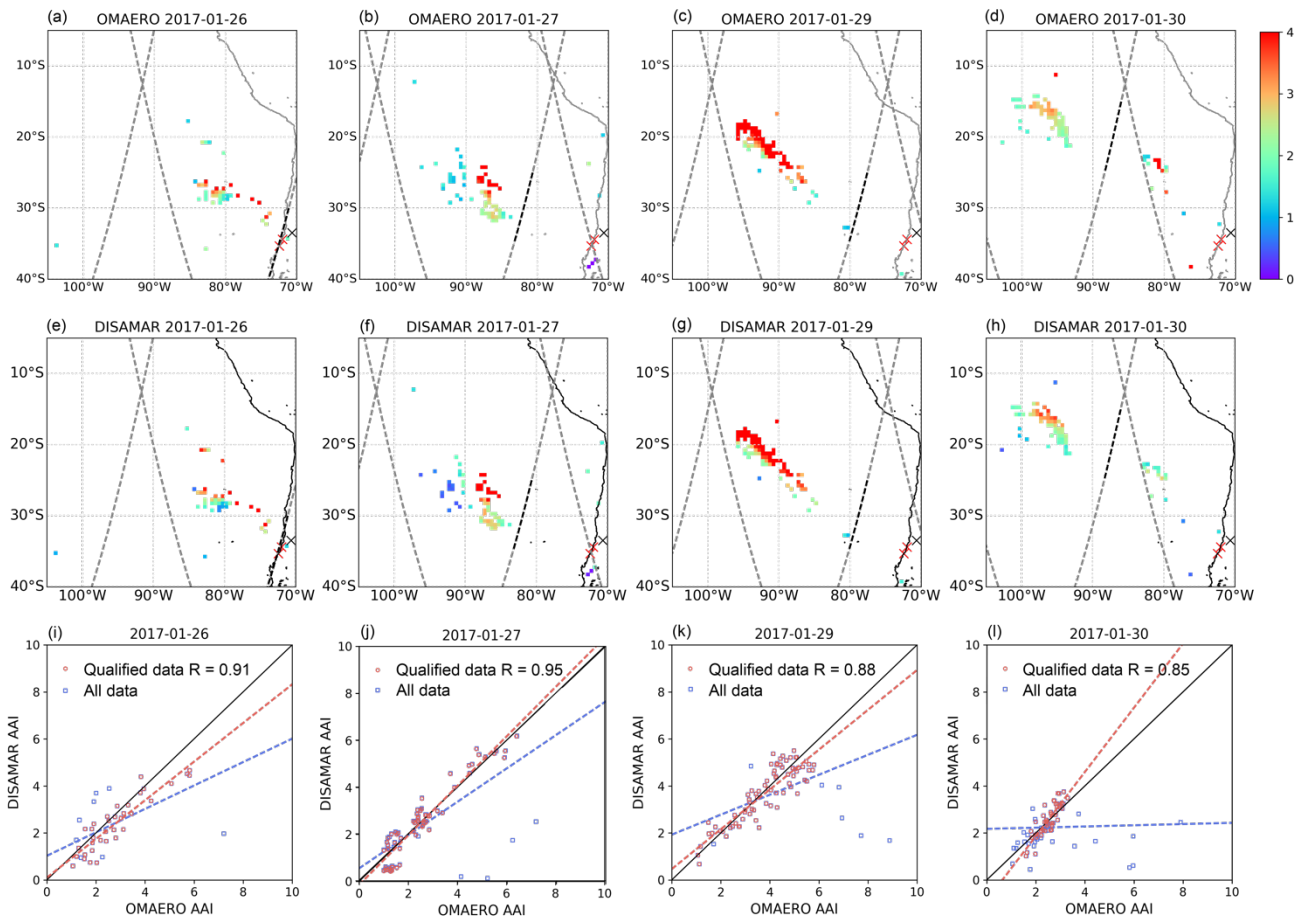

**Figure.8** OMI observations (a–d) and DISAMAR simulations (e–h) of the Chile wildfires on 26, 27, 29 and 30 January 2017. The black and red cross symbols are the AERONET station and the main fire sources (Pichilemu W34.39° S72.00° and Consitución S35.33°, W72.42°), respectively. The grey dashed line indicates the CALIOP paths in the region of interest, where the paths used to validate the plume height are marked by black dashed line. The scatter plots (i–l) present the OMI observations against DISAMAR simulations for only qualified data (red dot) and all data (blue dot), respectively.

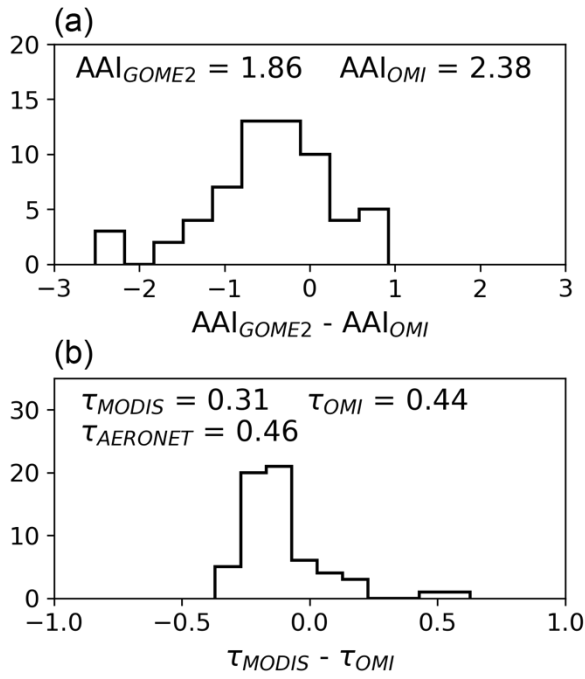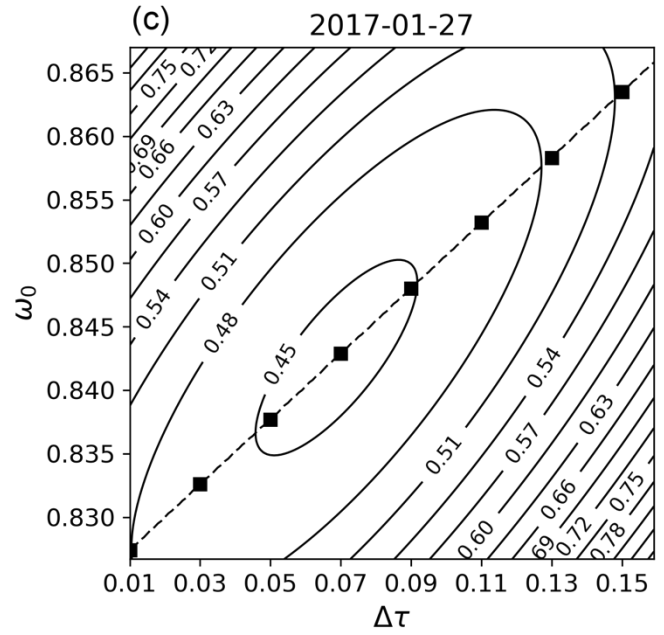

Figure.9 Histogram of (a) the AAI difference between GOME-2 and OMI, against (b) the  $\tau$  difference at 550 nm between MODIS and OMI for 27 January. Contour of (c) the AAI RMSE as a function of variation in  $\tau$  and  $\omega_0$  for 27 January. The dashed line is the best estimation for each pair of  $\Delta\tau$  and  $\omega_0$ .

**Table 1. Parameters used in sensitivity analysis.**

| Parameters                                                                   | Default value | Sensitivity range                              | Unit          |
|------------------------------------------------------------------------------|---------------|------------------------------------------------|---------------|
| Geometric mean radius ( $r_g$ )                                              | 0.15          | 0.1, 0.15, 0.2, 0.25, 0.3, 0.35, 0.4           | $\mu\text{m}$ |
| Geometric standard deviation ( $\sigma_g$ )                                  | 1.5           | -                                              | $\mu\text{m}$ |
| Real refractive index ( $n_r$ ) at 354 nm                                    | 1.5           | 1.3, 1.35, 1.4, 1.45, 1.5                      | -             |
| Imaginary refractive index ( $n_i$ ) at 354 nm                               | 0.06          | 0.04, 0.06, 0.08, 0.1                          | -             |
| Aerosol layer geometric central height ( $z_{\text{aer}}$ )                  | 4.5           | 2.5, 4.5, 6.5, 8.5                             | km            |
| Aerosol layer geometric thickness ( $\Delta z$ )                             | 1             | 0.5, 1, 1.5, 2                                 | km            |
| Aerosol optical thickness ( $\tau$ ) at 550 nm                               | 1             | 0.5, 1, 1.5, 2                                 | -             |
| Surface albedo ( $a_s$ )                                                     | 0.05          | 0.05, 0.1, 0.5, 1.0                            | -             |
| Surface pressure ( $P_s$ )                                                   | 1013          | 1013, 963, 913, 863, 813                       | hPa           |
| Solar zenith angle ( $\theta_0$ )                                            | 30            | 0, 15, 30, 45, 60, 75                          | $^\circ$      |
| Viewing zenith angle ( $\theta$ )                                            | 0             | 0, 15, 30, 45, 60, 75                          | $^\circ$      |
| Relative azimuth angle ( $\Delta\varphi = \varphi - \varphi_0 + 180^\circ$ ) | 0             | 0, $\pm 45$ , $\pm 90$ , $\pm 135$ , $\pm 180$ | $^\circ$      |

870

875

880

885

890

895

**Table.2 Summary of simulation results (applying IQR outlier detection).**

| Date                 |                         | 2017-01-26 | 2017-01-27 | 2017-01-29 | 2017-01-30 |
|----------------------|-------------------------|------------|------------|------------|------------|
| AAI                  | AAI median (OMAERO)     | 2.52       | 2.38       | 4.05       | 2.61       |
|                      | AAI median (DISAMAR)    | 2.17       | 2.48       | 3.81       | 2.49       |
|                      | Relative difference (%) | -13.88     | 4.20       | -5.93      | -4.60      |
|                      | RMSE                    | 0.67       | 0.51       | 0.60       | 0.41       |
| Aerosol<br>profile   | $z_{\text{aer}}$ [km]   | 4.9        | 4.5        | 4.7        | 4.7        |
|                      | $\Delta z$ [km]         | 2          |            |            |            |
| $\omega_0$ at 550 nm | $\omega_0$ (AERONET)    | 0.89       | 0.89       | 0.92       | 0.91       |
|                      | $\omega_0$ (DISAMAR)    | 0.83       | 0.81       | 0.87       | 0.85       |
|                      | Relative difference (%) | -6.74      | -8.99      | -5.43      | -6.59      |
